# Supplementary material for: Intermolecular epistasis shaped the function and evolution of an ancient transcription factor and its DNA binding sites
Source: eLife journal article supplement (doi:10.7554/elife.07864), 2015-06-15
Supplement: supp [file elife_poa_e07864_Supplementary_File_2.pdf › elife_poa_e07864_Supplementary_File_2.pdf]

A

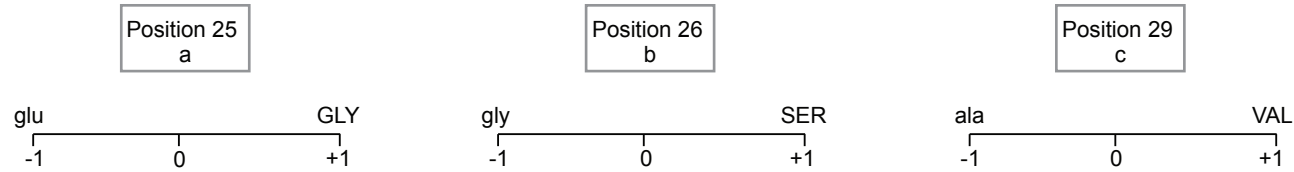

B

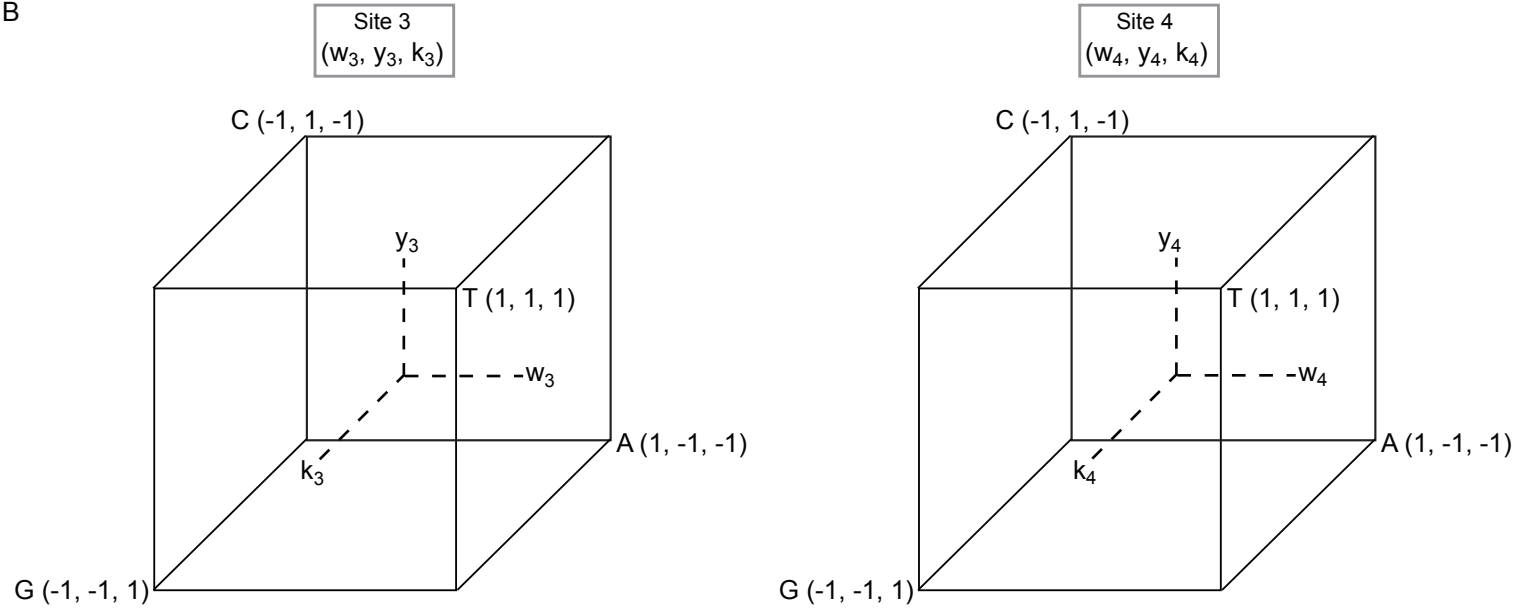

C.

| Genetic Term             | abc-/WYK-encoded equation                                                         |
|--------------------------|-----------------------------------------------------------------------------------|
| glu25GLY                 | 2a                                                                                |
| gly26SER                 | 2b                                                                                |
| ala29VAL                 | 2c                                                                                |
| A3                       | $w_3 - y_3 - k_3$                                                                 |
| C3                       | $-w_3 + y_3 - k_3$                                                                |
| G3                       | $-w_3 - y_3 + k_3$                                                                |
| T3                       | $w_3 + y_3 + k_3$                                                                 |
| A4                       | $w_4 - y_4 - k_4$                                                                 |
| C4                       | $-w_4 + y_4 - k_4$                                                                |
| G4                       | $-w_4 - y_4 + k_4$                                                                |
| T4                       | $w_4 + y_4 + k_4$                                                                 |
| glu25GLY x gly26SER      | 2 ( ab )                                                                          |
| glu25GLY x ala29VAL      | 2 ( ac )                                                                          |
| gly26SER x ala29VAL      | 2 ( bc )                                                                          |
| A3 x A4                  | $w_3w_4 - w_3y_4 - w_3k_4 - y_3w_4 + y_3y_4 + y_3k_4 - k_3w_4 + k_3y_4 + k_3k_4$  |
| A3 x C4                  | $-w_3w_4 + w_3y_4 - w_3k_4 + y_3w_4 - y_3y_4 + y_3k_4 + k_3w_4 - k_3y_4 + k_3k_4$ |
| A3 x G4                  | $-w_3w_4 - w_3y_4 + w_3k_4 + y_3w_4 + y_3y_4 - y_3k_4 + k_3w_4 + k_3y_4 - k_3k_4$ |
| A3 x T4                  | $w_3w_4 + w_3y_4 + w_3k_4 - y_3w_4 - y_3y_4 - y_3k_4 - k_3w_4 - k_3y_4 - k_3k_4$  |
| C3 x A4                  | $-w_3w_4 + w_3y_4 + w_3k_4 + y_3w_4 - y_3y_4 - y_3k_4 - k_3w_4 + k_3y_4 + k_3k_4$ |
| C3 x C4                  | $w_3w_4 - w_3y_4 + w_3k_4 - y_3w_4 + y_3y_4 - y_3k_4 + k_3w_4 - k_3y_4 + k_3k_4$  |
| C3 x G4                  | $w_3w_4 + w_3y_4 - w_3k_4 - y_3w_4 - y_3y_4 + y_3k_4 + k_3w_4 + k_3y_4 - k_3k_4$  |
| C3 x T4                  | $-w_3w_4 - w_3y_4 - w_3k_4 + y_3w_4 + y_3y_4 + y_3k_4 - k_3w_4 - k_3y_4 - k_3k_4$ |
| G3 x A4                  | $-w_3w_4 + w_3y_4 + w_3k_4 - y_3w_4 + y_3y_4 + y_3k_4 + k_3w_4 - k_3y_4 - k_3k_4$ |
| G3 x C4                  | $w_3w_4 - w_3y_4 + w_3k_4 + y_3w_4 - y_3y_4 + y_3k_4 - k_3w_4 + k_3y_4 - k_3k_4$  |
| G3 x T4                  | $-w_3w_4 - w_3y_4 - w_3k_4 - y_3w_4 - y_3y_4 - y_3k_4 + k_3w_4 + k_3y_4 + k_3k_4$ |
| T3 x A4                  | $w_3w_4 - w_3y_4 - w_3k_4 + y_3w_4 - y_3y_4 - y_3k_4 + k_3w_4 - k_3y_4 - k_3k_4$  |
| T3 x C4                  | $-w_3w_4 + w_3y_4 - w_3k_4 - y_3w_4 + y_3y_4 - y_3k_4 - k_3w_4 + k_3y_4 - k_3k_4$ |
| T3 x G4                  | $-w_3w_4 - w_3y_4 + w_3k_4 - y_3w_4 - y_3y_4 + y_3k_4 - k_3w_4 - k_3y_4 + k_3k_4$ |
| T3 x T4                  | $w_3w_4 + w_3y_4 + w_3k_4 + y_3w_4 + y_3y_4 + y_3k_4 + k_3w_4 + k_3y_4 + k_3k_4$  |
| glu25GLY x A3            | 2 ( aw <sub>3</sub> -ay <sub>3</sub> -ak <sub>3</sub> )                           |
| glu25GLY x C3            | 2 ( -aw <sub>3</sub> +ay <sub>3</sub> -ak <sub>3</sub> )                          |
| glu25GLY x G3            | 2 ( -aw <sub>3</sub> -ay <sub>3</sub> +ak <sub>3</sub> )                          |
| glu25GLY x T3            | 2 ( aw <sub>3</sub> +ay <sub>3</sub> +ak <sub>3</sub> )                           |
| glu25GLY x A4            | 2 ( aw <sub>4</sub> -ay <sub>4</sub> -ak <sub>4</sub> )                           |
| glu25GLY x C4            | 2 ( -aw <sub>4</sub> +ay <sub>4</sub> -ak <sub>4</sub> )                          |
| glu25GLY x G4            | 2 ( -aw <sub>4</sub> -ay <sub>4</sub> +ak <sub>4</sub> )                          |
| glu25GLY x T4            | 2 ( aw <sub>4</sub> +ay <sub>4</sub> +ak <sub>4</sub> )                           |
| gly26SER x A3            | 2 ( bw <sub>3</sub> -by <sub>3</sub> -bk <sub>3</sub> )                           |
| gly26SER x C3            | 2 ( -bw <sub>3</sub> +by <sub>3</sub> -bk <sub>3</sub> )                          |
| gly26SER x G3            | 2 ( -bw <sub>3</sub> -by <sub>3</sub> +bk <sub>3</sub> )                          |
| gly26SER x T3            | 2 ( bw <sub>3</sub> +by <sub>3</sub> +bk <sub>3</sub> )                           |
| gly26SER x A4            | 2 ( bw <sub>4</sub> -by <sub>4</sub> -bk <sub>4</sub> )                           |
| gly26SER x C4            | 2 ( -bw <sub>4</sub> +by <sub>4</sub> -bk <sub>4</sub> )                          |
| gly26SER x G4            | 2 ( -bw <sub>4</sub> -by <sub>4</sub> +bk <sub>4</sub> )                          |
| gly26SER x T4            | 2 ( bw <sub>4</sub> +by <sub>4</sub> +bk <sub>4</sub> )                           |
| ala29VAL x A3            | 2 ( cw <sub>3</sub> -cy <sub>3</sub> -ck <sub>3</sub> )                           |
| ala29VAL x C3            | 2 ( -cw <sub>3</sub> +cy <sub>3</sub> -ck <sub>3</sub> )                          |
| ala29VAL x G3            | 2 ( -cw <sub>3</sub> -cy <sub>3</sub> +ck <sub>3</sub> )                          |
| ala29VAL x T3            | 2 ( cw <sub>3</sub> +cy <sub>3</sub> +ck <sub>3</sub> )                           |
| ala29VAL x A4            | 2 ( cw <sub>4</sub> -cy <sub>4</sub> -ck <sub>4</sub> )                           |
| ala29VAL x C4            | 2 ( -cw <sub>4</sub> +cy <sub>4</sub> -ck <sub>4</sub> )                          |
| ala29VAL x G4            | 2 ( -cw <sub>4</sub> -cy <sub>4</sub> +ck <sub>4</sub> )                          |
| ala29VAL x T4            | 2 ( cw <sub>4</sub> +cy <sub>4</sub> +ck <sub>4</sub> )                           |
| glu25GLY x gly26SER x A3 | 2 ( abw <sub>3</sub> -aby <sub>3</sub> -abk <sub>3</sub> )                        |
| glu25GLY x gly26SER x C3 | 2 ( -abw <sub>3</sub> +aby <sub>3</sub> -abk <sub>3</sub> )                       |
| glu25GLY x gly26SER x G3 | 2 ( -abw <sub>3</sub> -aby <sub>3</sub> +abk <sub>3</sub> )                       |
| glu25GLY x gly26SER x T3 | 2 ( bk <sub>3</sub> +abw <sub>3</sub> +aby <sub>3</sub> +abk <sub>3</sub> )       |

|          |   |          |   |    |                                                                                               |
|----------|---|----------|---|----|-----------------------------------------------------------------------------------------------|
| glu25GLY | x | gly26SER | x | A4 | $2(abw_4 - aby_4 - abk_4)$                                                                    |
| glu25GLY | x | gly26SER | x | C4 | $2(-abw_4 + aby_4 - abk_4)$                                                                   |
| glu25GLY | x | gly26SER | x | G4 | $2(-abw_4 - aby_4 + abk_4)$                                                                   |
| glu25GLY | x | gly26SER | x | T4 | $2(abw_4 + aby_4 + abk_4)$                                                                    |
| glu25GLY | x | ala29VAL | x | A3 | $2(acw_3 - acy_3 - ack_3)$                                                                    |
| glu25GLY | x | ala29VAL | x | C3 | $2(-acw_3 + acy_3 - ack_3)$                                                                   |
| glu25GLY | x | ala29VAL | x | G3 | $2(-acw_3 - acy_3 + ack_3)$                                                                   |
| glu25GLY | x | ala29VAL | x | T3 | $2(acw_3 + acy_3 + ack_3)$                                                                    |
| glu25GLY | x | ala29VAL | x | A4 | $2(acw_4 - acy_4 - ack_4)$                                                                    |
| glu25GLY | x | ala29VAL | x | C4 | $2(-acw_4 + acy_4 - ack_4)$                                                                   |
| glu25GLY | x | ala29VAL | x | G4 | $2(-acw_4 - acy_4 + ack_4)$                                                                   |
| glu25GLY | x | ala29VAL | x | T4 | $2(acw_4 + acy_4 + ack_4)$                                                                    |
| gly26SER | x | ala29VAL | x | A3 | $2(bcw_3 - bcy_3 - bck_3)$                                                                    |
| gly26SER | x | ala29VAL | x | C3 | $2(-bcw_3 + bcy_3 - bck_3)$                                                                   |
| gly26SER | x | ala29VAL | x | G3 | $2(-bcw_3 - bcy_3 + bck_3)$                                                                   |
| gly26SER | x | ala29VAL | x | T3 | $2(bcw_3 + bcy_3 + bck_3)$                                                                    |
| gly26SER | x | ala29VAL | x | A4 | $2(bcw_4 - bcy_4 - bck_4)$                                                                    |
| gly26SER | x | ala29VAL | x | C4 | $2(-bcw_4 + bcy_4 - bck_4)$                                                                   |
| gly26SER | x | ala29VAL | x | G4 | $2(-bcw_4 - bcy_4 + bck_4)$                                                                   |
| gly26SER | x | ala29VAL | x | T4 | $2(bcw_4 + bcy_4 + bck_4)$                                                                    |
| glu25GLY | x | A3       | x | A4 | $2(aw_3w_4 - aw_3y_4 - aw_3k_4 - ay_3w_4 + ay_3y_4 + ay_3k_4 - ak_3w_4 + ak_3y_4 + ak_3k_4)$  |
| glu25GLY | x | A3       | x | C4 | $2(-aw_3w_4 + aw_3y_4 - aw_3k_4 + ay_3w_4 - ay_3y_4 + ay_3k_4 + ak_3w_4 - ak_3y_4 + ak_3k_4)$ |
| glu25GLY | x | A3       | x | G4 | $2(-aw_3w_4 - aw_3y_4 + aw_3k_4 + ay_3w_4 + ay_3y_4 - ay_3k_4 + ak_3w_4 + ak_3y_4 - ak_3k_4)$ |
| glu25GLY | x | A3       | x | T4 | $2(aw_3w_4 + aw_3y_4 + aw_3k_4 - ay_3w_4 - ay_3y_4 - ay_3k_4 - ak_3w_4 - ak_3y_4 - ak_3k_4)$  |
| glu25GLY | x | C3       | x | A4 | $2(-aw_3w_4 + aw_3y_4 + aw_3k_4 + ay_3w_4 - ay_3y_4 - ay_3k_4 - ak_3w_4 + ak_3y_4 + ak_3k_4)$ |
| glu25GLY | x | C3       | x | C4 | $2(aw_3w_4 - aw_3y_4 + aw_3k_4 - ay_3w_4 + ay_3y_4 - ay_3k_4 + ak_3w_4 - ak_3y_4 + ak_3k_4)$  |
| glu25GLY | x | C3       | x | G4 | $2(aw_3w_4 + aw_3y_4 - aw_3k_4 - ay_3w_4 - ay_3y_4 + ay_3k_4 + ak_3w_4 + ak_3y_4 - ak_3k_4)$  |
| glu25GLY | x | C3       | x | T4 | $2(-aw_3w_4 - aw_3y_4 - aw_3k_4 + ay_3w_4 + ay_3y_4 + ay_3k_4 - ak_3w_4 - ak_3y_4 - ak_3k_4)$ |
| glu25GLY | x | G3       | x | A4 | $2(-aw_3w_4 + aw_3y_4 + aw_3k_4 - ay_3w_4 + ay_3y_4 + ay_3k_4 + ak_3w_4 - ak_3y_4 - ak_3k_4)$ |
| glu25GLY | x | G3       | x | C4 | $2(aw_3w_4 - aw_3y_4 + aw_3k_4 + ay_3w_4 - ay_3y_4 + ay_3k_4 - ak_3w_4 + ak_3y_4 - ak_3k_4)$  |
| glu25GLY | x | G3       | x | G4 | $2(aw_3w_4 + aw_3y_4 - aw_3k_4 + ay_3w_4 + ay_3y_4 - ay_3k_4 - ak_3w_4 - ak_3y_4 + ak_3k_4)$  |
| glu25GLY | x | G3       | x | T4 | $2(-aw_3w_4 - aw_3y_4 - aw_3k_4 - ay_3w_4 - ay_3y_4 - ay_3k_4 + ak_3w_4 + ak_3y_4 + ak_3k_4)$ |
| glu25GLY | x | T3       | x | A4 | $2(aw_3w_4 - aw_3y_4 - aw_3k_4 + ay_3w_4 - ay_3y_4 - ay_3k_4 + ak_3w_4 - ak_3y_4 - ak_3k_4)$  |
| glu25GLY | x | T3       | x | C4 | $2(-aw_3w_4 + aw_3y_4 - aw_3k_4 - ay_3w_4 + ay_3y_4 - ay_3k_4 - ak_3w_4 + ak_3y_4 - ak_3k_4)$ |
| glu25GLY | x | T3       | x | G4 | $2(-aw_3w_4 - aw_3y_4 + aw_3k_4 - ay_3w_4 - ay_3y_4 + ay_3k_4 - ak_3w_4 - ak_3y_4 + ak_3k_4)$ |
| glu25GLY | x | T3       | x | T4 | $2(aw_3w_4 + aw_3y_4 + aw_3k_4 + ay_3w_4 + ay_3y_4 + ay_3k_4 + ak_3w_4 + ak_3y_4 + ak_3k_4)$  |
| gly26SER | x | A3       | x | A4 | $2(bw_3w_4 - bw_3y_4 - bw_3k_4 - by_3w_4 + by_3y_4 + by_3k_4 - bk_3w_4 + bk_3y_4 + bk_3k_4)$  |
| gly26SER | x | A3       | x | C4 | $2(-bw_3w_4 + bw_3y_4 - bw_3k_4 + by_3w_4 - by_3y_4 + by_3k_4 + bk_3w_4 - bk_3y_4 + bk_3k_4)$ |
| gly26SER | x | A3       | x | G4 | $2(-bw_3w_4 - bw_3y_4 + bw_3k_4 + by_3w_4 + by_3y_4 - by_3k_4 + bk_3w_4 + bk_3y_4 - bk_3k_4)$ |
| gly26SER | x | A3       | x | T4 | $2(bw_3w_4 + bw_3y_4 + bw_3k_4 - by_3w_4 - by_3y_4 - by_3k_4 - bk_3w_4 - bk_3y_4 - bk_3k_4)$  |
| gly26SER | x | C3       | x | A4 | $2(-bw_3w_4 + bw_3y_4 + bw_3k_4 - by_3w_4 - by_3y_4 - by_3k_4 - bk_3w_4 + bk_3y_4 + bk_3k_4)$ |
| gly26SER | x | C3       | x | C4 | $2(bw_3w_4 - bw_3y_4 + bw_3k_4 - by_3w_4 + by_3y_4 - by_3k_4 + bk_3w_4 - bk_3y_4 + bk_3k_4)$  |
| gly26SER | x | C3       | x | G4 | $2(bw_3w_4 + bw_3y_4 - bw_3k_4 - by_3w_4 - by_3y_4 + by_3k_4 + bk_3w_4 + bk_3y_4 - bk_3k_4)$  |
| gly26SER | x | C3       | x | T4 | $2(-bw_3w_4 - bw_3y_4 - bw_3k_4 + by_3w_4 + by_3y_4 + by_3k_4 - bk_3w_4 - bk_3y_4 - bk_3k_4)$ |
| gly26SER | x | G3       | x | A4 | $2(-bw_3w_4 + bw_3y_4 + bw_3k_4 - by_3w_4 + by_3y_4 + by_3k_4 + bk_3w_4 - bk_3y_4 - bk_3k_4)$ |
| gly26SER | x | G3       | x | C4 | $2(bw_3w_4 - bw_3y_4 + bw_3k_4 + by_3w_4 - by_3y_4 - by_3k_4 - bk_3w_4 + bk_3y_4 - bk_3k_4)$  |
| gly26SER | x | G3       | x | G4 | $2(bw_3w_4 + bw_3y_4 - bw_3k_4 + by_3w_4 + by_3y_4 - by_3k_4 - bk_3w_4 - bk_3y_4 + bk_3k_4)$  |
| gly26SER | x | G3       | x | T4 | $2(-bw_3w_4 - bw_3y_4 - bw_3k_4 - by_3w_4 - by_3y_4 - by_3k_4 + bk_3w_4 + bk_3y_4 + bk_3k_4)$ |
| gly26SER | x | T3       | x | A4 | $2(bw_3w_4 - bw_3y_4 - bw_3k_4 + by_3w_4 - by_3y_4 - by_3k_4 + bk_3w_4 - bk_3y_4 - bk_3k_4)$  |
| gly26SER | x | T3       | x | C4 | $2(-bw_3w_4 + bw_3y_4 - bw_3k_4 - by_3w_4 + by_3y_4 - by_3k_4 - bk_3w_4 + bk_3y_4 - bk_3k_4)$ |
| gly26SER | x | T3       | x | G4 | $2(-bw_3w_4 - bw_3y_4 + bw_3k_4 - by_3w_4 - by_3y_4 + by_3k_4 - bk_3w_4 - bk_3y_4 + bk_3k_4)$ |
| gly26SER | x | T3       | x | T4 | $2(bw_3w_4 + bw_3y_4 + bw_3k_4 + by_3w_4 + by_3y_4 + by_3k_4 + bk_3w_4 + bk_3y_4 + bk_3k_4)$  |
| ala29VAL | x | A3       | x | A4 | $2(cw_3w_4 - cw_3y_4 - cw_3k_4 - cy_3w_4 + cy_3y_4 + cy_3k_4 - ck_3w_4 + ck_3y_4 + ck_3k_4)$  |
| ala29VAL | x | A3       | x | C4 | $2(-cw_3w_4 + cw_3y_4 - cw_3k_4 + cy_3w_4 - cy_3y_4 + cy_3k_4 + ck_3w_4 - ck_3y_4 + ck_3k_4)$ |
| ala29VAL | x | A3       | x | G4 | $2(-cw_3w_4 - cw_3y_4 + cw_3k_4 + cy_3w_4 + cy_3y_4 - cy_3k_4 + ck_3w_4 + ck_3y_4 - ck_3k_4)$ |
| ala29VAL | x | A3       | x | T4 | $2(cw_3w_4 + cw_3y_4 + cw_3k_4 - cy_3w_4 - cy_3y_4 - cy_3k_4 - ck_3w_4 - ck_3y_4 - ck_3k_4)$  |
| ala29VAL | x | C3       | x | A4 | $2(-cw_3w_4 + cw_3y_4 + cw_3k_4 + cy_3w_4 - cy_3y_4 - cy_3k_4 - ck_3w_4 + ck_3y_4 + ck_3k_4)$ |
| ala29VAL | x | C3       | x | C4 | $2(cw_3w_4 - cw_3y_4 + cw_3k_4 - cy_3w_4 + cy_3y_4 - cy_3k_4 + ck_3w_4 - ck_3y_4 + ck_3k_4)$  |
| ala29VAL | x | C3       | x | G4 | $2(cw_3w_4 + cw_3y_4 - cw_3k_4 - cy_3w_4 - cy_3y_4 + cy_3k_4 + ck_3w_4 + ck_3y_4 - ck_3k_4)$  |
| ala29VAL | x | C3       | x | T4 | $2(-cw_3w_4 - cw_3y_4 - cw_3k_4 + cy_3w_4 + cy_3y_4 + cy_3k_4 - ck_3w_4 - ck_3y_4 - ck_3k_4)$ |

|          |   |    |   |    |                                                                               |
|----------|---|----|---|----|-------------------------------------------------------------------------------|
| ala29VAL | x | G3 | x | A4 | $2(-cw_3w_4+cw_3y_4+cw_3k_4-cy_3w_4+cy_3y_4+cy_3k_4+ck_3w_4-ck_3y_4-ck_3k_4)$ |
| ala29VAL | x | G3 | x | C4 | $2(cw_3w_4-cw_3y_4+cw_3k_4+cy_3w_4-cy_3y_4+cy_3k_4-ck_3w_4+ck_3y_4-ck_3k_4)$  |
| ala29VAL | x | G3 | x | G4 | $2(cw_3w_4+cw_3y_4-cw_3k_4+cy_3w_4+cy_3y_4-cy_3k_4-ck_3w_4-ck_3y_4+ck_3k_4)$  |
| ala29VAL | x | G3 | x | T4 | $2(-cw_3w_4-cw_3y_4-cw_3k_4-cy_3w_4-cy_3y_4-cy_3k_4+ck_3w_4+ck_3y_4+ck_3k_4)$ |
| ala29VAL | x | T3 | x | A4 | $2(cw_3w_4-cw_3y_4-cw_3k_4+cy_3w_4-cy_3y_4-cy_3k_4+ck_3w_4-ck_3y_4-ck_3k_4)$  |
| ala29VAL | x | T3 | x | C4 | $2(-cw_3w_4+cw_3y_4-cw_3k_4-cy_3w_4+cy_3y_4-cy_3k_4-ck_3w_4+ck_3y_4-ck_3k_4)$ |
| ala29VAL | x | T3 | x | G4 | $2(-cw_3w_4-cw_3y_4+cw_3k_4-cy_3w_4-cy_3y_4+cy_3k_4-ck_3w_4-ck_3y_4+ck_3k_4)$ |
| ala29VAL | x | T3 | x | T4 | $2(cw_3w_4+cw_3y_4+cw_3k_4+cy_3w_4+cy_3y_4+cy_3k_4+ck_3w_4+ck_3y_4+ck_3k_4)$  |
