# Supplementary material for: Intermolecular epistasis shaped the function and evolution of an ancient transcription factor and its DNA binding sites
Source: eLife journal article supplement (doi:10.7554/elife.07864), 2015-06-15
Supplement: supp [file elife_poa_e07864_Supplementary_File_3.xlsx]

## Sheet: Sheet1
Supplementary File 3
Genetic Term	abc-/WYK-encoded equation
glu25GLY	2a
gly26SER	2b
ala29VAL	2c
A3	w3-y3-k3
C3	-w3+y3-k3
G3	-w3-y3+k3
T3	w3+y3+k3
A4	w4-y4-k4
C4	-w4+y4-k4
G4	-w4-y4+k4
T4	w4+y4+k4
glu25GLY x gly26SER	2(ab)
glu25GLY x ala29VAL	2(ac)
gly26SER x ala29VAL	2(bc)
A3 x A4	w3w4-w3y4-w3k4-y3w4+y3y4+y3k4-k3w4+k3y4+k3k4
A3 x C4	-w3w4+w3y4-w3k4+y3w4-y3y4+y3k4+k3w4-k3y4+k3k4
A3 x G4	-w3w4-w3y4+w3k4+y3w4+y3y4-y3k4+k3w4+k3y4-k3k4
A3 x T4	w3w4+w3y4+w3k4-y3w4-y3y4-y3k4-k3w4-k3y4-k3k4
C3 x A4	-w3w4+w3y4+w3k4+y3w4-y3y4-y3k4-k3w4+k3y4+k3k4
C3 x C4	w3w4-w3y4+w3k4-y3w4+y3y4-y3k4+k3w4-k3y4+k3k4
C3 x G4	w3w4+w3y4-w3k4-y3w4-y3y4+y3k4+k3w4+k3y4-k3k4
C3 x T4	-w3w4-w3y4-w3k4+y3w4+y3y4+y3k4-k3w4-k3y4-k3k4
G3 x A4	-w3w4+w3y4+w3k4-y3w4+y3y4+y3k4+k3w4-k3y4-k3k4
G3 x C4	w3w4-w3y4+w3k4+y3w4-y3y4+y3k4-k3w4+k3y4-k3k4
G3 x T4	-w3w4-w3y4-w3k4-y3w4-y3y4-y3k4+k3w4+k3y4+k3k4
T3 x A4	w3w4-w3y4-w3k4+y3w4-y3y4-y3k4+k3w4-k3y4-k3k4
T3 x C4	-w3w4+w3y4-w3k4-y3w4+y3y4-y3k4-k3w4+k3y4-k3k4
T3 x G4	-w3w4-w3y4+w3k4-y3w4-y3y4+y3k4-k3w4-k3y4+k3k4
T3 x T4	w3w4+w3y4+w3k4+y3w4+y3y4+y3k4+k3w4+k3y4+k3k4
glu25GLY x A3	2(aw3-ay3-ak3)
glu25GLY x C3	2(-aw3+ay3-ak3)
glu25GLY x G3	2(-aw3-ay3+ak3)
glu25GLY x T3	2(aw3+ay3+ak3)
glu25GLY x A4	2(aw4-ay4-ak4)
glu25GLY x C4	2(-aw4+ay4-ak4)
glu25GLY x G4	2(-aw4-ay4+ak4)
glu25GLY x T4	2(aw4+ay4+ak4)
gly26SER x A3	2(bw3-by3-bk3)
gly26SER x C3	2(-bw3+by3-bk3)
gly26SER x G3	2(-bw3-by3+bk3)
gly26SER x T3	2(bw3+by3+bk3)
gly26SER x A4	2(bw4-by4-bk4)
gly26SER x C4	2(-bw4+by4-bk4)
gly26SER x G4	2(-bw4-by4+bk4)
gly26SER x T4	2(bw4+by4+bk4)
ala29VAL x A3	2(cw3-cy3-ck3)
ala29VAL x C3	2(-cw3+cy3-ck3)
ala29VAL x G3	2(-cw3-cy3+ck3)
ala29VAL x T3	2(cw3+cy3+ck3)
ala29VAL x A4	2(cw4-cy4-ck4)
ala29VAL x C4	2(-cw4+cy4-ck4)
ala29VAL x G4	2(-cw4-cy4+ck4)
ala29VAL x T4	2(cw4+cy4+ck4)
glu25GLY x gly26SER x A3	2(abw3-aby3-abk3)
glu25GLY x gly26SER x C3	2(-abw3+aby3-abk3)
glu25GLY x gly26SER x G3	2(-abw3-aby3+abk3)
glu25GLY x gly26SER x T3	2(bk3+abw3+aby3+abk3)
glu25GLY x gly26SER x A4	2(abw4-aby4-abk4)
glu25GLY x gly26SER x C4	2(-abw4+aby4-abk4)
glu25GLY x gly26SER x G4	2(-abw4-aby4+abk4)
glu25GLY x gly26SER x T4	2(abw4+aby4+abk4)
glu25GLY x ala29VAL x A3	2(acw3-acy3-ack3)
glu25GLY x ala29VAL x C3	2(-acw3+acy3-ack3)
glu25GLY x ala29VAL x G3	2(-acw3-acy3+ack3)
glu25GLY x ala29VAL x T3	2(acw3+acy3+ack3)
glu25GLY x ala29VAL x A4	2(acw4-acy4-ack4)
glu25GLY x ala29VAL x C4	2(-acw4+acy4-ack4)
glu25GLY x ala29VAL x G4	2(-acw4-acy4+ack4)
glu25GLY x ala29VAL x T4	2(acw4+acy4+ack4)
gly26SER x ala29VAL x A3	2(bcw3-bcy3-bck3)
gly26SER x ala29VAL x C3	2(-bcw3+bcy3-bck3)
gly26SER x ala29VAL x G3	2(-bcw3-bcy3+bck3)
gly26SER x ala29VAL x T3	2(bcw3+bcy3+bck3)
gly26SER x ala29VAL x A4	2(bcw4-bcy4-bck4)
gly26SER x ala29VAL x C4	2(-bcw4+bcy4-bck4)
gly26SER x ala29VAL x G4	2(-bcw4-bcy4+bck4)
gly26SER x ala29VAL x T4	2(bcw4+bcy4+bck4)
glu25GLY x A3 x A4	2(aw3w4-aw3y4-aw3k4-ay3w4+ay3y4+ay3k4-ak3w4+ak3y4+ak3k4)
glu25GLY x A3 x C4	2(-aw3w4+aw3y4-aw3k4+ay3w4-ay3y4+ay3k4+ak3w4-ak3y4+ak3k4)
glu25GLY x A3 x G4	2(-aw3w4-aw3y4+aw3k4+ay3w4+ay3y4-ay3k4+ak3w4+ak3y4-ak3k4)
glu25GLY x A3 x T4	2(aw3w4+aw3y4+aw3k4-ay3w4-ay3y4-ay3k4-ak3w4-ak3y4-ak3k4)
glu25GLY x C3 x A4	2(-aw3w4+aw3y4+aw3k4+ay3w4-ay3y4-ay3k4-ak3w4+ak3y4+ak3k4)
glu25GLY x C3 x C4	2(aw3w4-aw3y4+aw3k4-ay3w4+ay3y4-ay3k4+ak3w4-ak3y4+ak3k4)
glu25GLY x C3 x G4	2(aw3w4+aw3y4-aw3k4-ay3w4-ay3y4+ay3k4+ak3w4+ak3y4-ak3k4)
glu25GLY x C3 x T4	2(-aw3w4-aw3y4-aw3k4+ay3w4+ay3y4+ay3k4-ak3w4-ak3y4-ak3k4)
glu25GLY x G3 x A4	2(-aw3w4+aw3y4+aw3k4-ay3w4+ay3y4+ay3k4+ak3w4-ak3y4-ak3k4)
glu25GLY x G3 x C4	2(aw3w4-aw3y4+aw3k4+ay3w4-ay3y4+ay3k4-ak3w4+ak3y4-ak3k4)
glu25GLY x G3 x G4	2(aw3w4+aw3y4-aw3k4+ay3w4+ay3y4-ay3k4-ak3w4-ak3y4+ak3k4)
glu25GLY x G3 x T4	2(-aw3w4-aw3y4-aw3k4-ay3w4-ay3y4-ay3k4+ak3w4+ak3y4+ak3k4)
glu25GLY x T3 x A4	2(aw3w4-aw3y4-aw3k4+ay3w4-ay3y4-ay3k4+ak3w4-ak3y4-ak3k4)
glu25GLY x T3 x C4	2(-aw3w4+aw3y4-aw3k4-ay3w4+ay3y4-ay3k4-ak3w4+ak3y4-ak3k4)
glu25GLY x T3 x G4	2(-aw3w4-aw3y4+aw3k4-ay3w4-ay3y4+ay3k4-ak3w4-ak3y4+ak3k4)
glu25GLY x T3 x T4	2(aw3w4+aw3y4+aw3k4+ay3w4+ay3y4+ay3k4+ak3w4+ak3y4+ak3k4)
gly26SER x A3 x A4	2(bw3w4-bw3y4-bw3k4-by3w4+by3y4+by3k4-bk3w4+bk3y4+bk3k4)
gly26SER x A3 x C4	2(-bw3w4+bw3y4-bw3k4+by3w4-by3y4+by3k4+bk3w4-bk3y4+bk3k4)
gly26SER x A3 x G4	2(-bw3w4-bw3y4+bw3k4+by3w4+by3y4-by3k4+bk3w4+bk3y4-bk3k4)
gly26SER x A3 x T4	2(bw3w4+bw3y4+bw3k4-by3w4-by3y4-by3k4-bk3w4-bk3y4-bk3k4)
gly26SER x C3 x A4	2(-bw3w4+bw3y4+bw3k4+by3w4-by3y4-by3k4-bk3w4+bk3y4+bk3k4)
gly26SER x C3 x C4	2(bw3w4-bw3y4+bw3k4-by3w4+by3y4-by3k4+bk3w4-bk3y4+bk3k4)
gly26SER x C3 x G4	2(bw3w4+bw3y4-bw3k4-by3w4-by3y4+by3k4+bk3w4+bk3y4-bk3k4)
gly26SER x C3 x T4	2(-bw3w4-bw3y4-bw3k4+by3w4+by3y4+by3k4-bk3w4-bk3y4-bk3k4)
gly26SER x G3 x A4	2(-bw3w4+bw3y4+bw3k4-by3w4+by3y4+by3k4+bk3w4-bk3y4-bk3k4)
gly26SER x G3 x C4	2(bw3w4-bw3y4+bw3k4+by3w4-by3y4+by3k4-bk3w4+bk3y4-bk3k4)
gly26SER x G3 x G4	2(bw3w4+bw3y4-bw3k4+by3w4+by3y4-by3k4-bk3w4-bk3y4+bk3k4)
gly26SER x G3 x T4	2(-bw3w4-bw3y4-bw3k4-by3w4-by3y4-by3k4+bk3w4+bk3y4+bk3k4)
gly26SER x T3 x A4	2(bw3w4-bw3y4-bw3k4+by3w4-by3y4-by3k4+bk3w4-bk3y4-bk3k4)
gly26SER x T3 x C4	2(-bw3w4+bw3y4-bw3k4-by3w4+by3y4-by3k4-bk3w4+bk3y4-bk3k4)
gly26SER x T3 x G4	2(-bw3w4-bw3y4+bw3k4-by3w4-by3y4+by3k4-bk3w4-bk3y4+bk3k4)
gly26SER x T3 x T4	2(bw3w4+bw3y4+bw3k4+by3w4+by3y4+by3k4+bk3w4+bk3y4+bk3k4)
ala29VAL x A3 x A4	2(cw3w4-cw3y4-cw3k4-cy3w4+cy3y4+cy3k4-ck3w4+ck3y4+ck3k4)
ala29VAL x A3 x C4	2(-cw3w4+cw3y4-cw3k4+cy3w4-cy3y4+cy3k4+ck3w4-ck3y4+ck3k4)
ala29VAL x A3 x G4	2(-cw3w4-cw3y4+cw3k4+cy3w4+cy3y4-cy3k4+ck3w4+ck3y4-ck3k4)
ala29VAL x A3 x T4	2(cw3w4+cw3y4+cw3k4-cy3w4-cy3y4-cy3k4-ck3w4-ck3y4-ck3k4)
ala29VAL x C3 x A4	2(-cw3w4+cw3y4+cw3k4+cy3w4-cy3y4-cy3k4-ck3w4+ck3y4+ck3k4)
ala29VAL x C3 x C4	2(cw3w4-cw3y4+cw3k4-cy3w4+cy3y4-cy3k4+ck3w4-ck3y4+ck3k4)
ala29VAL x C3 x G4	2(cw3w4+cw3y4-cw3k4-cy3w4-cy3y4+cy3k4+ck3w4+ck3y4-ck3k4)
ala29VAL x C3 x T4	2(-cw3w4-cw3y4-cw3k4+cy3w4+cy3y4+cy3k4-ck3w4-ck3y4-ck3k4)
ala29VAL x G3 x A4	2(-cw3w4+cw3y4+cw3k4-cy3w4+cy3y4+cy3k4+ck3w4-ck3y4-ck3k4)
ala29VAL x G3 x C4	2(cw3w4-cw3y4+cw3k4+cy3w4-cy3y4+cy3k4-ck3w4+ck3y4-ck3k4)
ala29VAL x G3 x G4	2(cw3w4+cw3y4-cw3k4+cy3w4+cy3y4-cy3k4-ck3w4-ck3y4+ck3k4)
ala29VAL x G3 x T4	2(-cw3w4-cw3y4-cw3k4-cy3w4-cy3y4-cy3k4+ck3w4+ck3y4+ck3k4)
ala29VAL x T3 x A4	2(cw3w4-cw3y4-cw3k4+cy3w4-cy3y4-cy3k4+ck3w4-ck3y4-ck3k4)
ala29VAL x T3 x C4	2(-cw3w4+cw3y4-cw3k4-cy3w4+cy3y4-cy3k4-ck3w4+ck3y4-ck3k4)
ala29VAL x T3 x G4	2(-cw3w4-cw3y4+cw3k4-cy3w4-cy3y4+cy3k4-ck3w4-ck3y4+ck3k4)
ala29VAL x T3 x T4	2(cw3w4+cw3y4+cw3k4+cy3w4+cy3y4+cy3k4+ck3w4+ck3y4+ck3k4)
