# Supplementary material for: Intermolecular epistasis shaped the function and evolution of an ancient transcription factor and its DNA binding sites
Source: eLife. 2015 Jun 15;4:e07864. doi: 10.7554/eLife.07864 (PMC4500092; doi:10.7554/eLife.07864)
Supplement: Supplementary file 1. — First-order and epistatic genetic determinants of binding affinity. First-order effects indicate the difference in binding energy relative to the mean across all data, while the second-order effects are the marginal addition to the additive sum of the first-order effects. Third-order effects are the marginal addition to the additive sum of all lower-order effects. (A) The energetic effects of binding for all first-order and epistatic terms in the RE as determined by linear modeling for each protein genotype. (B) The energetic effects for amino acid replacements averaged across all 16 REs. (C) The energetic effects from a global model, including all possible first-, second-, and third-order effects within and between the protein and DNA. DOI: http://dx.doi.org/10.7554/eLife.07864.011 [file elife07864s001.xlsx]

## Sheet: Table 1
Supplemental Data File 1.
A.
glu-gly-ala FIRST ORDER
nucleotide	ΔΔGdissociation (kcal/mol)
A3	0.0167
C3	-0.0598
G3	0.983
T3	-0.401
	mult R2	0.6
	adj R2	0.58
	p-value	6.365e-09
	LRT	sig; p=7.92E-14
A4	-0.0764
C4	-0.432
G4	0.00194
T4	0.506
	mult R2	0.18
	adj R2	0.13	mult R2	0.78
	p-value	0.03031	adj R2	0.75
	LRT	sig; p=1.87E-6	p-value	3.256e-12
glu-gly-ala SECOND ORDER
nucleotides	ΔΔGdissociation (kcal/mol)
AA	0.402
AC	-0.0622
AG	-0.165
AT	-0.175
CA	0.136
CC	0.409
CG	-0.154
CT	-0.391
GA	-0.535
GC	-0.52
GG	0.249
GT	0.811
TA	-0.00333
TC	0.179
TG	0.07		mult R2	0.98
TT	-0.245		adj R2	0.98
	LRT	sig; p=3.83E-4	p-value	<2.20E-16
GLY-gly-ala FIRST ORDER
nucleotide	ΔΔGdissociation (kcal/mol)
A3	0.0548
C3	-0.238
G3	0.473
T3	-0.3
	mult R2	0.6
	adj R2	0.58
	p-value	6.365e-09
	LRT	sig; p=7.73E-12
A4	-0.0117
C4	-0.063
G4	-0.111
T4	0.188
	mult R2	0.09
	adj R2	0.02	mult R2	0.71
	p-value	0.2583	adj R2	0.67
	LRT	sig; p=5.94E-3	p-value	1.373e-09
GLY-gly-ala SECOND ORDER
nucleotides	ΔΔGdissociation (kcal/mol)
AA	0.00325
AC	0.0271
AG	0.128
AT	-0.159
CA	0.0485
CC	0.28
CG	-0.304
CT	-0.0247
GA	0.023
GC	-0.47
GG	0.191
GT	0.261
TA	-0.0747
TC	0.166
TG	-0.01		mult R2	0.95
TT	-0.0773		adj R2	0.93
	LRT	sig; p=1.49E-14	p-value	<2.20E-16
glu-SER-ala FIRST ORDER
nucleotide	ΔΔGdissociation (kcal/mol)
A3	-0.0783
C3	-0.177
G3	0.38
T3	-0.126
	mult R2	0.4192
	adj R2	0.3796
	p-value	2.306e-05
	LRT	sig; p=9.58E-8
A4	0.0978
C4	-0.225
G4	-0.0481
T4	0.175
	mult R2	0.1978
	adj R2	0.1432	mult R2	0.62
	p-value	0.02028	adj R2	0.56
	LRT	sig; p=1.70E-4	p-value	2.77e-07
glu-SER-ala SECOND ORDER
nucleotides	ΔΔGdissociation (kcal/mol)
AA	0.00856
AC	0.00327
AG	-0.082
AT	0.0407
CA	-0.183
CC	0.307
CG	0.0932
CT	-0.216
GA	0.0838
GC	-0.39
GG	0.0162
GT	0.292
TA	0.0911
TC	0.0527
TG	-0.03		mult R2	0.86
TT	-0.117		adj R2	0.8
	LRT	sig; p=1.36E-7	p-value	8.27e-10
glu-gly-VAL FIRST ORDER
nucleotide	ΔΔGdissociation (kcal/mol)
A3	-0.106
C3	-0.245
G3	0.317
T3	0.034
	mult R2	0.3
	adj R2	0.25
	p-value	0.001314
	LRT	sig; p=2.40E-4
A4	0.0416
C4	-0.125
G4	-0.097
T4	0.18
	mult R2	0.1
	adj R2	0.04	mult R2	0.4
	p-value	0.1908	adj R2	0.31
	LRT	not sig; p=5.82E-2	p-value	0.001315
glu-gly-VAL SECOND ORDER
nucleotides	ΔΔGdissociation (kcal/mol)
AA	0.0228
AC	0.0946
AG	-0.0248
AT	-0.0925
CA	-0.0879
CC	0.281
CG	0.114
CT	-0.307
GA	0.099
GC	-0.38
GG	-0.202
GT	0.48
TA	-0.0338
TC	0.00108
TG	0.11		mult R2	0.68
TT	-0.08		adj R2	0.53
	LRT	sig; p=3.84E-4	p-value	0.0001608
GLY-SER-ala FIRST ORDER
nucleotide	ΔΔGdissociation (kcal/mol)
A3	-0.0211
C3	-0.195
G3	0.346
T3	-0.13
	mult R2	0.53
	adj R2	0.5
	p-value	2.434e-07
	LRT	sig; p=1.42E-10
A4	0.185
C4	-0.0883
G4	-0.116
T4	0.0192
	mult R2	0.17
	adj R2	0.11	mult R2	0.7
	p-value	0.04067	adj R2	0.66
	LRT	sig; p=8.26E-5	p-value	2.39e-09
GLY-SER-ala SECOND ORDER
nucleotides	ΔΔGdissociation (kcal/mol)
AA	0.0211
AC	0.0153
AG	0.04
AT	-0.0764
CA	-0.0969
CC	0.168
CG	-0.0822
CT	0.0115
GA	0.177
GC	-0.35
GG	0.0769
GT	0.0952
TA	-0.101
TC	0.166
TG	-0.03		mult R2	0.9
TT	-0.0303		adj R2	0.85
	LRT	sig; p=6.40E-8	p-value	1.189e-11
GLY-gly-VAL FIRST ORDER
nucleotide	ΔΔGdissociation (kcal/mol)
A3	0.0959
C3	-0.256
G3	0.0511
T3	0.109
	mult R2	0.16
	adj R2	0.1
	p-value	0.05
	LRT	sig; p=1.14E-3
A4	0.384
C4	-0.127
G4	-0.289
T4	0.0316
	mult R2	0.4405
	adj R2	0.4023	mult R2	0.6
	p-value	1.038e-05	adj R2	0.54
	LRT	sig; p=9.18E-8	p-value	6.737e-07
GLY-gly-VAL SECOND ORDER
nucleotides	ΔΔGdissociation (kcal/mol)
AA	0.179
AC	-0.0674
AG	-0.146
AT	0.0338
CA	-0.408
CC	0.362
CG	0.104
CT	-0.0574
GA	0.428
GC	-0.35
GG	-0.159
GT	0.0813
TA	-0.199
TC	0.0556
TG	0.2		mult R2	0.95
TT	-0.0577		adj R2	0.93
	LRT	sig; p<2.20E-16	p-value	<2.20E-16
glu-SER-VAL FIRST ORDER
nucleotide	ΔΔGdissociation (kcal/mol)
A3	-0.125
C3	0.0596
G3	-0.064
T3	0.129
	mult R2	0.11
	adj R2	0.05
	p-value	0.1468
	LRT	not sig; p=9.33E-7
A4	0.124
C4	-0.106
G4	-0.0597
T4	0.0419
	mult R2	0.09
	adj R2	0.03	mult R2	0.2
	p-value	0.24	adj R2	0.09
	LRT	not sig; p=1.58E-1	p-value	0.13
glu-SER-VAL SECOND ORDER
nucleotides	ΔΔGdissociation (kcal/mol)
AA	0.05
AC	0.116
AG	-0.0568
AT	-0.11
CA	-0.358
CC	0.34
CG	0.281
CT	-0.263
GA	0.292
GC	-0.37
GG	-0.149
GT	0.23
TA	0.0154
TC	-0.0817
TG	-0.07		mult R2	0.75
TT	0.141		adj R2	0.62
	LRT	sig; p=1.49E-8	p-value	7.545e-06
GLY-SER-VAL FIRST ORDER
nucleotide	ΔΔGdissociation (kcal/mol)
A3	0.0408
C3	-0.144
G3	0.138
T3	-0.0352
	mult R2	0.08
	adj R2	0.02
	p-value	0.2782
	LRT	sig; p=6.23E-3
A4	0.447
C4	-0.214
G4	-0.281
T4	0.0478
	mult R2	0.64
	adj R2	0.61	mult R2	0.718
	p-value	1.011e-09	adj R2	0.68
	LRT	sig; p=3.11E-12	p-value	6.944e-10
GLY-SER-VAL SECOND ORDER
nucleotides	ΔΔGdissociation (kcal/mol)
AA	0.224
AC	-0.163
AG	-0.155
AT	0.0937
CA	-0.242
CC	0.255
CG	0.11
CT	-0.122
GA	0.139
GC	-0.18
GG	-0.0639
GT	0.106
TA	-0.12
TC	0.0885
TG	0.11		mult R2	0.9
TT	-0.077		adj R2	0.85
	LRT	sig; p=2.52E-7	p-value	1.251e-11

## Sheet: Table 2
B.
PROTEIN FIRST ORDER
residue	ΔΔGdissociation (kcal/mol)
glu25GLY	1.346
	mult R2	0.46
	adj R2	0.46
	p-value	<2.2e16
gly26SER	-0.784
	mult R2	0.16
	adj R2	0.16
	p-value	3.617e-16
ala29VAL	-0.65
	mult R2	0.11	mult R2	0.73
	adj R2	0.11	adj R2	0.73
	p-value	3.16e-11	p-value	<2.2e-16
PROTEIN SECOND ORDER
residues	ΔΔGdissociation (kcal/mol)
glu25GLY x gly26SER	-0.382
	mult R2 improvement	0.04
	adj R2 improvement	0.04
	p-value	<2.2e-16
	LRT	sig; p=1.94E-14
glu25GLY x ala29VAL	-0.064
	mult R2 improvement	0.01
	adj R2 improvement	0
	p-value	<2.2e-26
	LRT	not sig; p=2.15E-1
gly26SER x ala29VAL	0.376
	mult R2 improvement	0.04
	adj R2 improvement	0.04	mult R2	0.81
	p-value	<2.2e-26	adj R2	0.81
	LRT	sig; p=4.43E-14	p-value	<2.2e-16
PROTEIN THIRD ORDER
residues	ΔΔGdissociation (kcal/mol)
glu25GLY x gly26SER x ala29VAL	0.0323
	mult R2 improvement	0
	adj R2 improvement	0	mult R2	0.81
	p-value	<2.2e-16	adj R2	0.81
	LRT	not sig; p=1.47E-1	p-value	<2.2e-16

## Sheet: Table 3
C.
GLOBAL FIRST ORDER
	term	ΔΔGdissociation (kcal/mol)
Protein first order	glu25GLY	1.35
	gly26SER	-0.78
	ala29VAL	-0.65
DNA first order	A3	-0.01
	C3	-0.223
	G3	0.327
	T3	-0.0897
	A4	0.149
	C4	-0.172	mult R2	0.8002
	G4	-0.125	adj R2	0.7954
	T4	0.148	p-value	<2.2e-16
GLOBAL INTRAMOLECULAR SECOND ORDER
	term	ΔΔGdissociation (kcal/mol)
Protein second order (intramolecular)	25x26	-0.38
	25x29	-0.06
	26x29	0.38
DNA second order (intramolecular)	AA	0.114
	AC	0
	AG	-0.057
	AT	-0.055
	CA	-0.149
	CC	0.299
	CG	0.0202
	CT	-0.171
	GA	0.0879
	GC	-0.38
	GG	-0.005
	GT	0.294
	TA	-0.053	mult R2	0.9022
	TC	0.0785	adj R2	0.8966
	TG	0.04	p-value	<2.2e-16
	TT	-0.0679	LRT	sig; p<2.2E-16
GLOBAL INTERMOLECULAR SECOND ORDER
term		ΔΔGdissociation (kcal/mol)
residue	nucleotide
25	A3	0.1178
25	C3	0.0318
25	G3	-0.15
25	T3	0.0018
25	A4	0.204
25	C4	0.0976
25	G4	-0.1484
25	T4	-0.1534
26	A3	-0.0632
26	C3	0.22
26	G3	-0.256
26	T3	0.0986
26	A4	0.129
26	C4	0.0284
26	G4	-0.00264
26	T4	-0.1548
29	A3	-0.01894
29	C3	0.155
29	G3	-0.434
29	T3	0.298
29	A4	0.2	mult R2	0.94
29	C4	0.0594	adj R2	0.94
29	G4	-0.113	p-value	<2.2e-16
29	T4	-0.1464	LRT	sig; p<2.20E-16
GLOBAL INTERMOLECULAR THIRD ORDER
term		ΔΔGdissociation (kcal/mol)
residue	nucleotide
25	AA	-0.01368
25	AC	-0.0922
25	AG	0.0486
25	AT	0.0572
25	CA	-0.0518
25	CC	-0.0674
25	CG	-0.1262
25	CT	0.246
25	GA	0.206
25	GC	0.08
25	GG	0.0324
25	GT	-0.318
25	TA	-0.1406
25	TC	0.081
25	TG	0.05
25	TT	0.01458
26	AA	-0.0754
26	AC	0.00218
26	AG	-0.01186
26	AT	0.085
26	CA	-0.14
26	CC	-0.07
26	CG	0.16
26	CT	0.05
26	GA	0.1686
26	GC	0.11
26	GG	-0.0496
26	GT	-0.226
26	TA	0.0486
26	TC	-0.044
26	TG	-0.1
26	TT	0.094
29	AA	0.0104
29	AC	-0.00818
29	AG	-0.0758
29	AT	0.0736
29	CA	-0.25
29	CC	0.02
29	CG	0.26
29	CT	-0.03
29	GA	0.302
29	GC	0.114557
29	GG	-0.276
29	GT	-0.1398
29	TA	-0.0624
29	TC	-0.1246
29	TG	0.09
29	TT	0.0984
25x26	A3	-0.006
25x26	C3	-0.1424
25x26	G3	0.236
25x26	T3	-0.086
25x26	A4	0.00138
25x26	C4	-0.0838
25x26	G4	0.0037
25x26	T4	0.0788
25x29	A3	0.0654
25x29	C3	-0.139
25x29	G3	0.1198
25x29	T3	-0.0462
25x29	A4	0.1284
25x29	C4	-0.153
25x29	G4	-0.058
25x29	T4	0.0826
26x29	A3	0.0268
26x29	C3	-0.01224
26x29	G3	0.1088
26x29	T3	-0.1234
26x29	A4	-0.056	mult R2	0.97
26x29	C4	-0.063	adj R2	0.97
26x29	G4	0.0248	p-value	<2.2e-16
26x29	T4	0.0942	LRT	sig; p<2.20E-16
