# Supplementary figures and images for: Intermolecular epistasis shaped the function and evolution of an ancient transcription factor and its DNA binding sites
Source: eLife journal article supplement (doi:10.7554/elife.07864), 2015-06-15

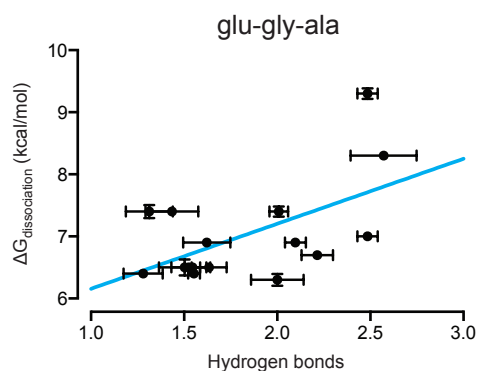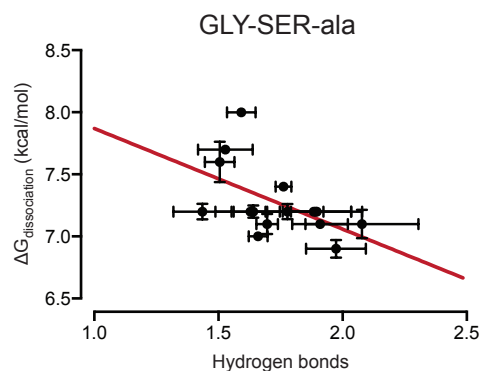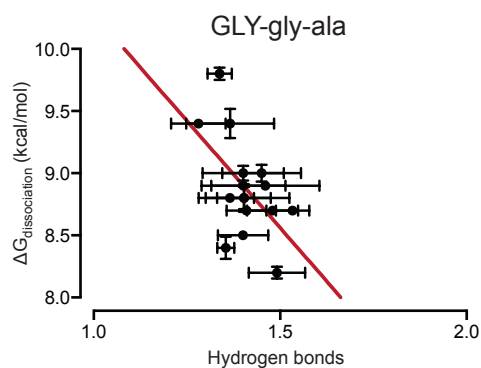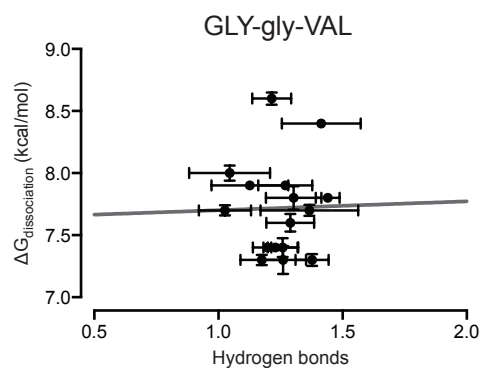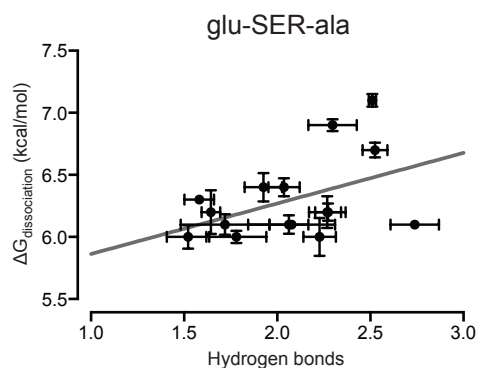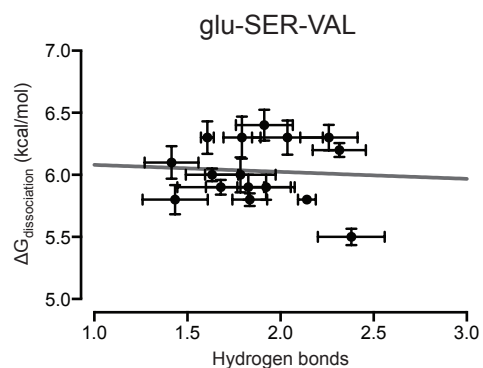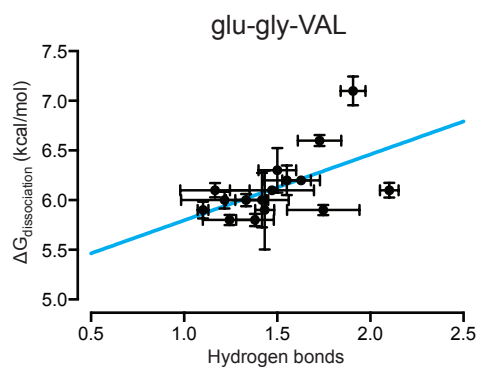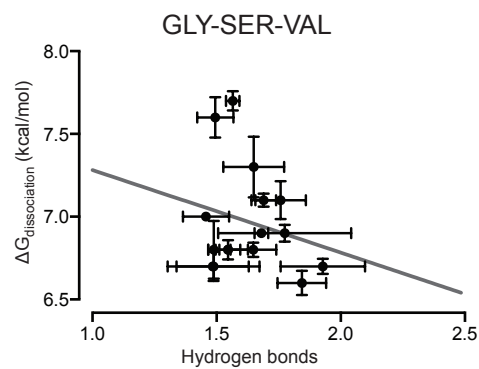

Figure 6 - figure supplement 1.

Supplement: supp [file elife_poa_e07864_Figure_6_figure_supplement_1.pdf › elife_poa_e07864_Figure_6_figure_supplement_1.pdf]

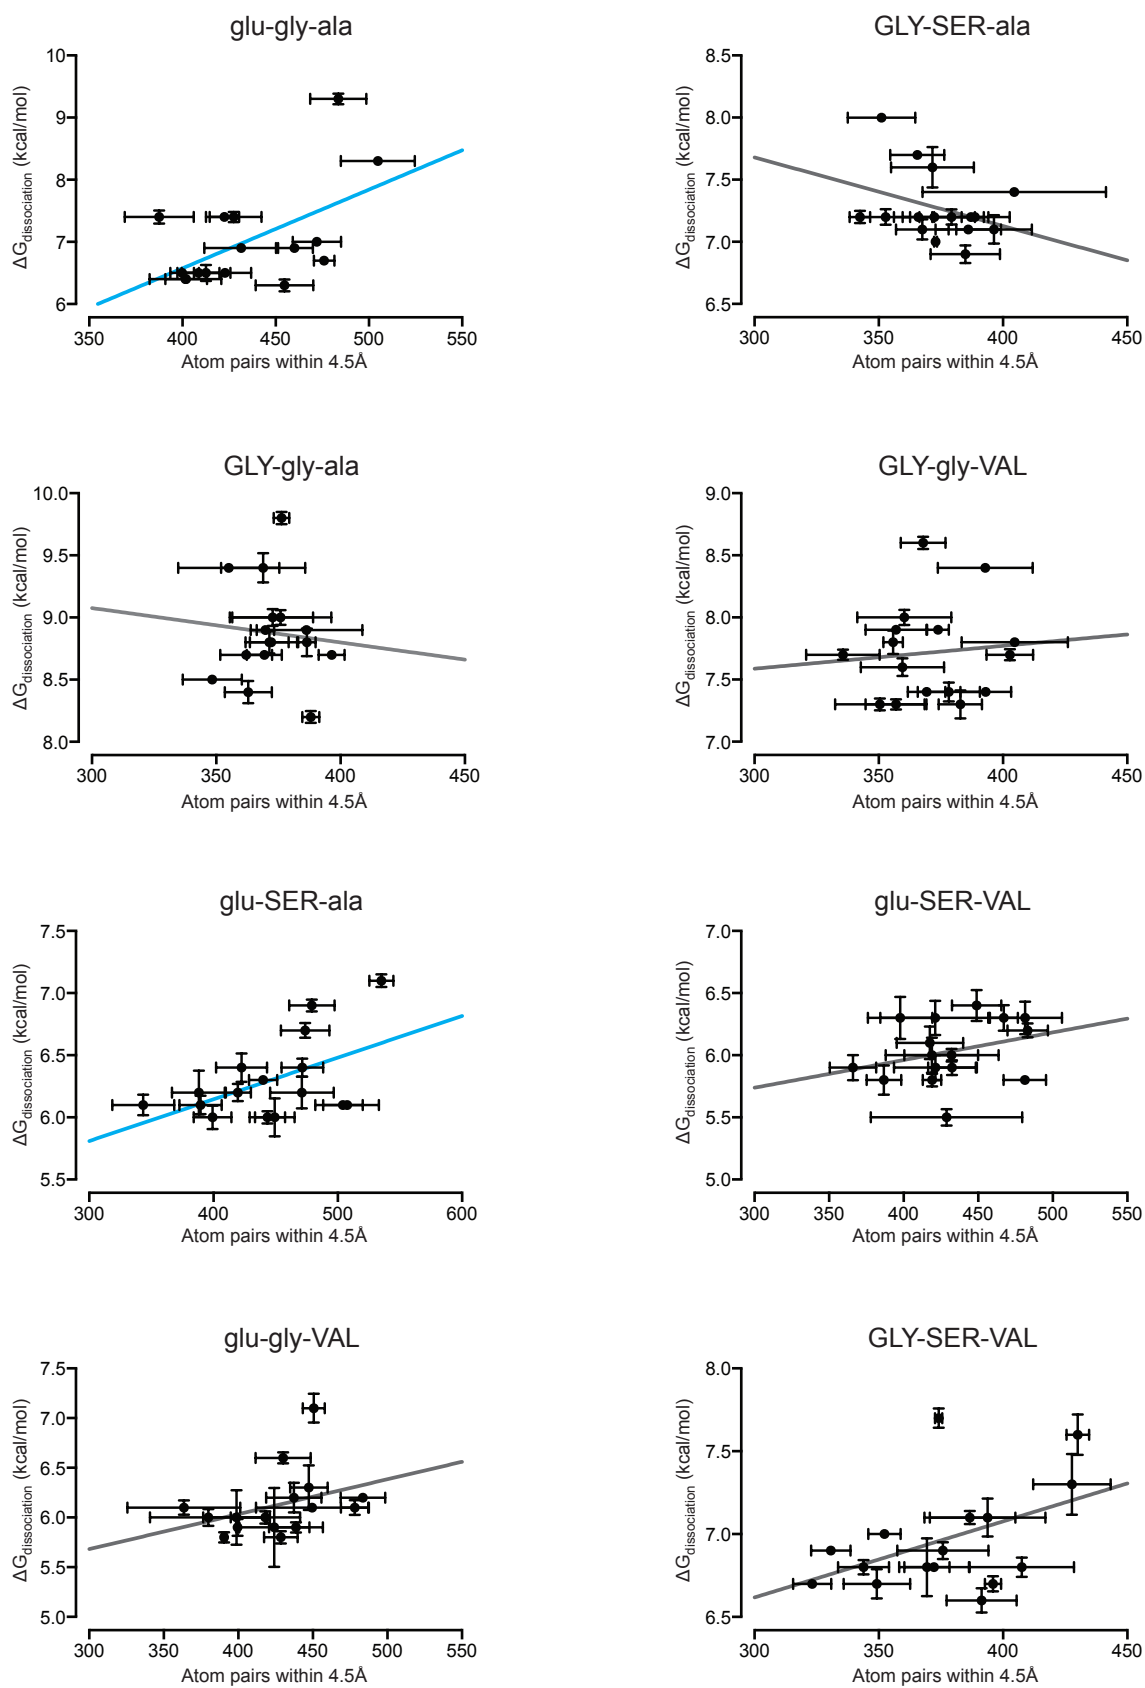

Figure 6 - figure supplement 2.

Supplement: supp [file elife_poa_e07864_Figure_6_figure_supplement_2.pdf › elife_poa_e07864_Figure_6_figure_supplement_2.pdf]
